# Supplementary material for: Partisan asymmetries in online political activity
Source: Springer Nature journal article supplement (doi:10.1140/epjds6), 2012-06-18

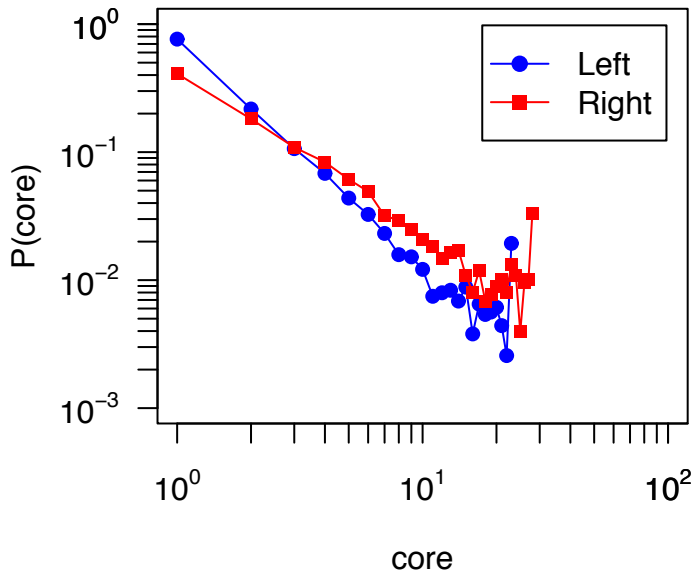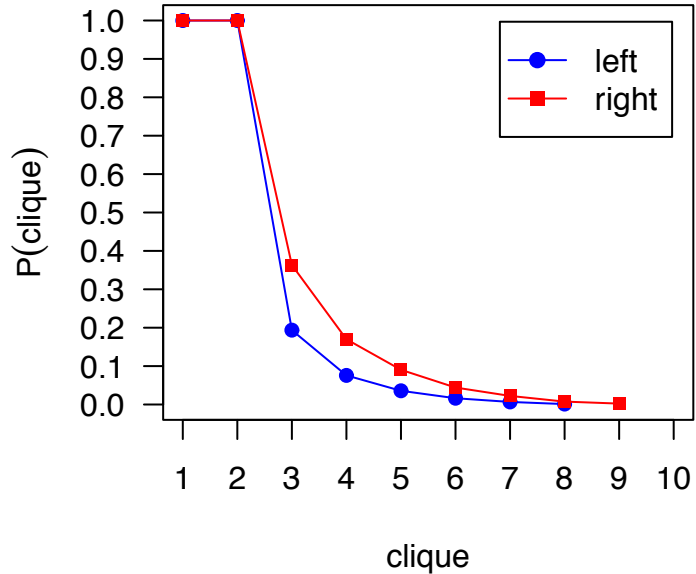

Supplement: 13688_2012_6_MOESM9_ESM.pdf [file 13688_2012_6_MOESM9_ESM.pdf]
